# Supplementary material
Source: PubMed Central journal article supplement (PMC8815593)
Supplement: KID.0000532020SupplementaryData.pdf [file KID.0000532020SupplementaryData.pdf]

**Appendix Table 1: ICD and CPT codes used**

| <b>Diagnosis</b>                                                                  | <b>ICD-9 codes</b>                                                                                                                                                                                                                                                                                                                                                                                                                                                                                                                                                                                                                                                                                                                                                                                 | <b>ICD-10 codes</b>                                                                                                                                                               |
|-----------------------------------------------------------------------------------|----------------------------------------------------------------------------------------------------------------------------------------------------------------------------------------------------------------------------------------------------------------------------------------------------------------------------------------------------------------------------------------------------------------------------------------------------------------------------------------------------------------------------------------------------------------------------------------------------------------------------------------------------------------------------------------------------------------------------------------------------------------------------------------------------|-----------------------------------------------------------------------------------------------------------------------------------------------------------------------------------|
| Chronic Kidney Disease (CKD)                                                      | CKD Stage 1-5: 585.1 – 585.5<br>unspecified CKD: 585.9<br><br>hypertensive CKD: 403.00 – 404.93<br><br>diabetic CKD: 249.40, 249.41,<br>250.40, 250.41, 250.42, 250.43                                                                                                                                                                                                                                                                                                                                                                                                                                                                                                                                                                                                                             | N18.1 – N18.5<br>N18.9<br><br>I12.0 – I13.2<br><br>E08.21, E08.22, E08.29<br>E09.21, E09.22, E09.29<br>E10.21, E10.22, E10.29<br>E11.21, E11.22, E11.29<br>E13.21, E13.22, E13.29 |
| Diabetes Mellitus (DM)                                                            | 249.00 – 250.93                                                                                                                                                                                                                                                                                                                                                                                                                                                                                                                                                                                                                                                                                                                                                                                    | E08.0 – E13.9                                                                                                                                                                     |
| Hypertension (HTN)                                                                | 401.0 – 405.99                                                                                                                                                                                                                                                                                                                                                                                                                                                                                                                                                                                                                                                                                                                                                                                     | I10 – I16.9                                                                                                                                                                       |
| Cardiovascular Disease (CVD)                                                      | 393. – 398.99<br>402.00 – 402.91<br>404.00 – 404.93<br>410.00 – 429.9                                                                                                                                                                                                                                                                                                                                                                                                                                                                                                                                                                                                                                                                                                                              | I05.0 – I09.9<br>I11.0, I11.9<br>I13.0 – I13.2<br>I20.0 – I52.                                                                                                                    |
| Peripheral Arterial Disease (PAD)                                                 | 440.0 – 440.9<br>443.0 – 443.9                                                                                                                                                                                                                                                                                                                                                                                                                                                                                                                                                                                                                                                                                                                                                                     | I70.0 – I70.92<br>I73.00 – I73.9                                                                                                                                                  |
| Stroke                                                                            | 430. – 438.9                                                                                                                                                                                                                                                                                                                                                                                                                                                                                                                                                                                                                                                                                                                                                                                       | I60.00 – I69.998<br>G45.0 – G45.9                                                                                                                                                 |
| Tumors                                                                            | Malignant: 140.0 – 209.36<br>Benign: 209.40 – 239.9                                                                                                                                                                                                                                                                                                                                                                                                                                                                                                                                                                                                                                                                                                                                                | C00.0 – C96.9<br>D00.00 – D49.9                                                                                                                                                   |
| <b>Procedure Type</b>                                                             | <b>CPT codes</b>                                                                                                                                                                                                                                                                                                                                                                                                                                                                                                                                                                                                                                                                                                                                                                                   |                                                                                                                                                                                   |
| Radiology (CT scans and interventional radiology)                                 | 70460 70470 70481 70482 70487 70491 70496 70498<br>71260 71270 71275 72126 72129 72132 72193 72194<br>73201 73701 74160 74170 74174 74175 74177 74178<br>75572 75574                                                                                                                                                                                                                                                                                                                                                                                                                                                                                                                                                                                                                               |                                                                                                                                                                                   |
| Cardiology (heart catheterization and percutaneous coronary intervention)         | 92920 92921 92924 92925 92928 92929 92933 92934<br>92937 92938 92941 92943 92944 92973 92978 92979<br>93451 93452 93453 93454 93455 93456 93457 93458<br>93459 93460 93461 93530 93531 93532 93533 93563<br>93564 93565 93566 93567 93568 93571 93572                                                                                                                                                                                                                                                                                                                                                                                                                                                                                                                                              |                                                                                                                                                                                   |
| Endovascular (peripheral angiography, venography, and percutaneous interventions) | 36005 36010 36011 36012 36100 36120 36140 36200<br>36215 36216 36217 36218 36221 36222 36223 36224<br>36225 36226 36227 36228 36245 36246 36247 36248<br>36251 36252 36253 36254 36901 36902 36903 36904<br>36905 36906 36907 36908 36909 37184 37185 37186<br>37187 37188 37191 37192 37193 37197 37211 37212<br>37213 37214 37215 37216 37217 37218 37220 37221<br>37222 37223 37224 37225 37226 37227 37228 37229<br>37230 37231 37232 37233 37234 37235 37236 37237<br>37238 37239 37241 37242 37243 37244 37246 37247<br>37248 37249 37252 37253 75600 75605 75625 75630<br>75635 75658 75705 75710 75716 75726 75731 75733<br>75736 75741 75743 75746 75756 75774 75820 75822<br>75825 75827 75831 75833 75840 75842 75860 75870<br>75872 75880 75894 75898 0234T 0235T 0236T 0237T<br>0238T |                                                                                                                                                                                   |

Appendix Table 2: Patients Characteristics by CKD recognition status with lab evidence of CKD by eGFR or uACR or both criteria

|                                                    | Lab Evidence of CKD | Recognition in Pt with eGFR<60 ml/min/1.73m2 only |                                | CKD Recognition in Pts with uACR>30 mg/g only |                           |                               | CKD Recognition in Pts with both eGFR+uACR criteria |                           |                               |                                   |
|----------------------------------------------------|---------------------|---------------------------------------------------|--------------------------------|-----------------------------------------------|---------------------------|-------------------------------|-----------------------------------------------------|---------------------------|-------------------------------|-----------------------------------|
| Characteristics <sup>a</sup>                       | Total<br>N=92,900   | Total<br>N= 67,899 (73%)                          | Recognized<br>N=29,536 (43.5%) | Not Recognized<br>N=38,363 (56.5%)            | Total<br>N=11,655 (12.5%) | Recognized<br>N=2,167 (18.6%) | Not Recognized<br>N=9,488 (85.4%)                   | Total<br>N=13,346 (14.3%) | Recognized<br>N=8,883 (66.6%) | Not Recognized<br>N=4,463 (33.4%) |
| Existing Patients at start of 10/2012 <sup>a</sup> | 70,478              | 50,798                                            | 22,517 (44.3%)                 | 28,281 (55.7%)                                | 8,596                     | 1,657 (19.3%)                 | 6,939 (81.7%)                                       | 11,084                    | 7,442 (67.1%)                 | 3,642 (32.9%)                     |
| Entered Cohort in 10/2012-09/2014 <sup>a</sup>     | 10,121              | 7,412                                             | 2,984 (40.3%)                  | 4,428 (59.7%)                                 | 1,523                     | 258 (16.9%)                   | 1,265 (83.1%)                                       | 1,186                     | 764 (64.4%)                   | 422 (35.6%)                       |
| Entered Cohort in 10/2014-09/2016 <sup>a</sup>     | 7,453               | 5,783                                             | 2,380 (41.2%)                  | 3,403 (58.8%)                                 | 981                       | 169 (17.2%)                   | 812 (82.8%)                                         | 689                       | 435 (63.1%)                   | 254 (36.9%)                       |
| Entered Cohort in 10/2016-09/2018 <sup>a</sup>     | 4,848               | 3,906                                             | 1,655 (42.4%)                  | 2,251 (57.6%)                                 | 555                       | 83 (14.95%)                   | 472 (85.05%)                                        | 387                       | 242 (62.5%)                   | 145 (37.5%)                       |
| Age, Mean (sd)                                     | 67.5 (11.3)         | 68.6 (11.3)                                       | 69.2 (11.2)                    | 68.1 (11.4)                                   | 61.4 (10.9)               | 60.5 (10.4)                   | 61.6 (11.0)                                         | 67.6 (9.5)                | 67.3 (9.6)                    | 68.1 (9.3)                        |
| Male, n (%)                                        | 88,514 (95.3%)      | 64,253 (94.6%)                                    | 28,492 (96.5%)                 | 35,761 (93.2%)                                | 11,237 (96.4%)            | 2,075 (95.7%)                 | 9,162 (96.6%)                                       | 13,024 (97.6%)            | 8,703 (98.0%)                 | 4,321 (96.8%)                     |
| Race, n (%)                                        |                     |                                                   |                                |                                               |                           |                               |                                                     |                           |                               |                                   |
| Non-hispanic White                                 | 54,302 (58.5%)      | 41,021 (60.4%)                                    | 17,222 (58.3%)                 | 23,799 (62.0%)                                | 5,685 (48.8%)             | 930 (42.9%)                   | 4,744 (50.1%)                                       | 7,596 (56.9%)             | 4,809 (54.1%)                 | 2,787 (62.5%)                     |
| Non-hispanic black                                 | 16,823 (18.1%)      | 12,950 (19.1%)                                    | 5,450 (18.5%)                  | 7,500 (19.6%)                                 | 1,666 (14.3%)             | 385 (17.8%)                   | 1,281 (13.5%)                                       | 2,207 (16.5%)             | 1,560 (17.6%)                 | 647 (14.5%)                       |
| Hispanics                                          | 11,206 (12.1%)      | 6,147 (9.1%)                                      | 3,431 (11.6%)                  | 2,716 (7.1%)                                  | 2,972 (25.5%)             | 596 (27.5%)                   | 2,376 (25.0%)                                       | 2,087 (15.6%)             | 1,537 (17.3%)                 | 550 (12.3%)                       |
| Asian                                              | 211 (0.2%)          | 131 (0.2%)                                        | 70 (0.2%)                      | 61 (0.2%)                                     | 48 (0.4%)                 | 7 (0.3%)                      | 41 (0.4%)                                           | 32 (0.2%)                 | 22 (0.3%)                     | 10 (0.2%)                         |
| American Indian/Pacific Islanders                  | 1,278 (1.4%)        | 852 (1.3%)                                        | 402 (1.4%)                     | 450 (1.2%)                                    | 196 (1.7%)                | 43 (2.0%)                     | 153 (1.6%)                                          | 230 (1.7%)                | 164 (1.9%)                    | 66 (1.5%)                         |
| Unknown                                            | 8,432 (9.1%)        | 6,317 (9.3%)                                      | 2,733 (9.2%)                   | 3,584 (9.3%)                                  | 1,009 (8.7%)              | 195 (9.0%)                    | 814 (8.6%)                                          | 1,106 (8.3%)              | 736 (8.3%)                    | 370 (8.3%)                        |
| Multi-Race                                         | 648 (0.7%)          | 481 (0.7%)                                        | 228 (0.8%)                     | 253 (0.7%)                                    | 79 (0.7%)                 | 11 (0.5%)                     | 68 (0.7%)                                           | 88 (0.7%)                 | 55 (0.6%)                     | 33 (0.7%)                         |
| BMI, Mean (sd)                                     | 30.5 (6.1)          | 29.9 (5.9)                                        | 30.0 (6.0)                     | 29.8 (5.8)                                    | 32.3 (6.5)                | 32.3 (6.3)                    | 32.3 (6.5)                                          | 31.7 (6.3)                | 31.8 (6.3)                    | 31.5 (6.2)                        |
| Co-morbidities, n (%)                              |                     |                                                   |                                |                                               |                           |                               |                                                     |                           |                               |                                   |
| Diabetes w/o Hypertension                          | 2,109 (2.3%)        | 1,428 (2.1%)                                      | 448 (1.5%)                     | 960 (2.6%)                                    | 499 (4.3%)                | 59 (2.7%)                     | 440 (4.6%)                                          | 182 (1.4%)                | 88 (1.0%)                     | 94 (2.1%)                         |
| Hypertension w/o diabetes                          | 37,774 (40.7%)      | 35,665 (52.5%)                                    | 13,668 (46.3%)                 | 21,997 (57.3%)                                | 950 (8.2%)                | 99 (4.6%)                     | 851 (9.0%)                                          | 1,159 (8.7%)              | 774 (8.7%)                    | 385 (8.6%)                        |
| Both Diabetes and Hypertension                     | 53,017 (57.1%)      | 30,806 (45.4%)                                    | 15,420 (52.2%)                 | 15,386 (40.1%)                                | 10,206 (87.6%)            | 2,009 (92.7%)                 | 8,197 (86.4%)                                       | 12,005 (89.9%)            | 8,021 (90.3%)                 | 3,984 (89.3%)                     |
| Heart disease                                      | 56,042 (60.3%)      | 40,857 (60.2%)                                    | 19,487 (66.0%)                 | 21,370 (55.7%)                                | 5,793 (49.7%)             | 1,167 (53.9%)                 | 4,626 (48.8%)                                       | 9,392 (70.4%)             | 6,393 (72.0%)                 | 2,999 (67.2%)                     |
| Peripheral arterial disease                        | 13,927 (15.0%)      | 9,244 (13.6%)                                     | 5,156 (17.5%)                  | 4,088 (10.7%)                                 | 1,622 (13.9%)             | 361 (16.7%)                   | 1,261 (13.3%)                                       | 3,061 (22.9%)             | 2,286 (25.7%)                 | 775 (17.4%)                       |
| Stroke                                             | 17,192 (18.5%)      | 12,381 (18.2%)                                    | 6,219 (21.1%)                  | 6,162 (16.1%)                                 | 1,749 (15.0%)             | 384 (17.7%)                   | 1,365 (14.4%)                                       | 3,062 (22.9%)             | 2,144 (24.1%)                 | 918 (20.6%)                       |
| Tumor                                              | 48,499 (52.2%)      | 35,983 (53.0%)                                    | 16,265 (55.1%)                 | 19,718 (51.4%)                                | 5,301 (45.5%)             | 1,054 (48.6%)                 | 4,247 (44.8%)                                       | 7,215 (54.1%)             | 4,873 (54.9%)                 | 2,342 (52.5%)                     |
| Primary Care visits/yr, Mean (sd)                  | 4.46 (2.80)         | 4.28 (2.71)                                       | ---                            | ---                                           | 4.66 (2.82)               | ---                           | ---                                                 | 5.20 (3.06)               | ---                           | ---                               |
| Specialty Care visits/yr, Mean (sd)                | 0.81 (1.76)         | 0.78 (1.74)                                       | ---                            | ---                                           | 0.60 (1.25)               | ---                           | ---                                                 | 1.10 (2.14)               | ---                           | ---                               |
| ER visit+Hospitalization/yr, Mean (sd)             | 0.71 (1.60)         | 0.71 (1.62)                                       | ---                            | ---                                           | 0.58 (1.37)               | ---                           | ---                                                 | 0.83 (1.63)               | ---                           | ---                               |
| Elective Procedures, n/yr, Mean (sd)               |                     |                                                   |                                |                                               |                           |                               |                                                     |                           |                               |                                   |
| Radiological                                       | 0.717 (2.06)        | 0.707 (2.10)                                      | ---                            | ---                                           | 0.803 (2.00)              | ---                           | ---                                                 | 0.695 (1.90)              | ---                           | ---                               |
| Endovascular                                       | 0.091 (0.58)        | 0.076 (0.51)                                      | ---                            | ---                                           | 0.079 (0.49)              | ---                           | ---                                                 | 0.180 (0.93)              | ---                           | ---                               |
| Cardiac                                            | 0.098 (0.51)        | 0.088 (0.48)                                      | ---                            | ---                                           | 0.075 (0.38)              | ---                           | ---                                                 | 0.168 (0.67)              | ---                           | ---                               |
| Median Blood Pressure Value                        |                     |                                                   |                                |                                               |                           |                               |                                                     |                           |                               |                                   |
| Not diagnosed with HTN (%)                         | 2,109 (2.3%)        | 1,428 (2.1%)                                      | ---                            | ---                                           | 499 (4.3%)                | ---                           | ---                                                 | 182 (1.4%)                | ---                           | ---                               |
| Not available (%)                                  | 348 (0.4%)          | 237 (0.4%)                                        | ---                            | ---                                           | 78 (0.7%)                 | ---                           | ---                                                 | 33 (0.3%)                 | ---                           | ---                               |
| <130/80 mmHg, n (%)                                | 29,340 (31.6%)      | 23,203 (34.2%)                                    | ---                            | ---                                           | 2,592 (22.2%)             | ---                           | ---                                                 | 3,545 (26.6%)             | ---                           | ---                               |
| 130-140/80-90 mmHg, n (%)                          | 48,044 (51.7%)      | 34,047 (50.1%)                                    | ---                            | ---                                           | 6,583 (56.5%)             | ---                           | ---                                                 | 7,414 (55.6%)             | ---                           | ---                               |
| >140/90 mmHg, n (%)                                | 13,059 (14.1%)      | 8,984 (13.2%)                                     | ---                            | ---                                           | 1,903 (16.3%)             | ---                           | ---                                                 | 2,172 (16.3%)             | ---                           | ---                               |
| Medications (%)                                    |                     |                                                   |                                |                                               |                           |                               |                                                     |                           |                               |                                   |
| ACEI/ARB                                           | 66,266 (71.3%)      | 45,192 (66.6%)                                    | 20,524 (69.5%)                 | 24,668 (64.3%)                                | 9,801 (84.1%)             | 1,940 (89.5%)                 | 7,861 (82.9%)                                       | 11,273 (84.5%)            | 7,564 (85.2%)                 | 3,709 (83.1%)                     |
| Diuretics                                          | 54,591 (58.8%)      | 38,771 (57.1%)                                    | 18,100 (61.3%)                 | 20,671 (53.9%)                                | 6,233 (53.5%)             | 1,295 (59.8%)                 | 4,938 (52.0%)                                       | 9,587 (71.8%)             | 6,634 (74.7%)                 | 2,953 (66.2%)                     |
| Statins                                            | 40,681 (43.8%)      | 28,653 (42.2%)                                    | 10,760 (36.4%)                 | 17,893 (46.6%)                                | 6,601 (56.6%)             | 1,266 (58.4%)                 | 5,335 (56.2%)                                       | 5,427 (40.7%)             | 3,407 (38.4%)                 | 2,020 (45.3%)                     |
| NSAIDs                                             | 71,467 (76.9%)      | 49,828 (73.4%)                                    | 22,579 (76.5%)                 | 27,249 (71.0%)                                | 9,945 (85.3%)             | 1,915 (88.4%)                 | 8,030 (81.4%)                                       | 1,694 (12.6%)             | 7,865 (88.5%)                 | 3,829 (85.8%)                     |

Foot note: <sup>a</sup> The percentage are calculated with denominator from a column before. The rest of the percentage (rows without <sup>a</sup>), are calculated with N from that column as denominator.

All the comparisons has p value &lt;0.0001, except Existing patients at start of 10/2012, BMI &amp; NSAIDs in uACR category, p=0.009, p=0.86, p=0.06, respectively, and Existing patients at start, BMI, cancer &amp; ACEI/ARB in both criteria, p=0.014, p=0.013, p=0.009, p=0.002,
